# Supplementary material for: Automated analysis of non-mass-enhancing lesions in breast MRI based on morphological, kinetic, and spatio-temporal moments and joint segmentation-motion compensation technique
Source: Springer Nature journal article supplement (doi:10.1186/1687-6180-2013-172), 2013-11-15

**a**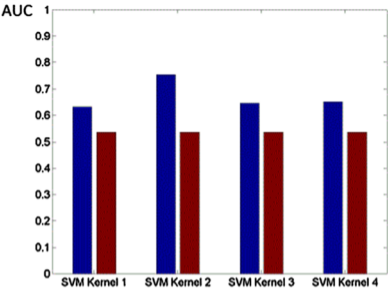**b**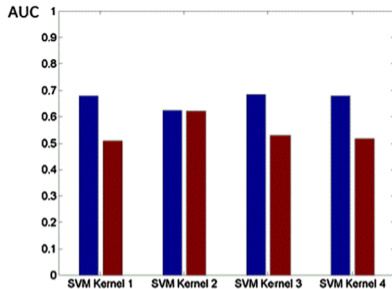**c**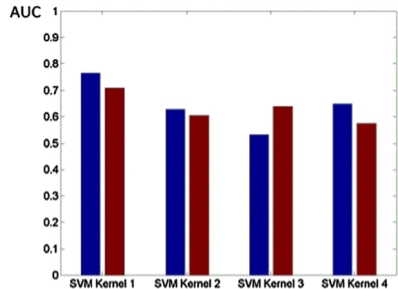**d**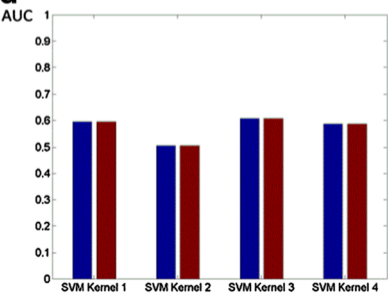**e**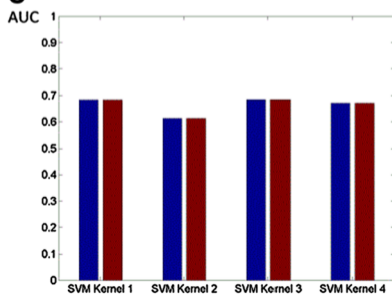**f**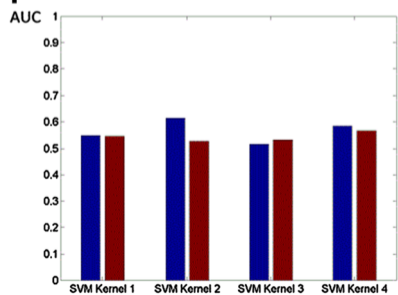

Supplement: 13634_2013_561_MOESM4_ESM.pdf [file 13634_2013_561_MOESM4_ESM.pdf]
